# Supplementary material for: Hierarchical porous Fe/N doped carbon nanofibers as host materials for high sulfur loading Li–S batteries
Source: Royal Society of Chemistry journal article supplement (doi:10.1039/c9nr04408f), 2019-01-01
Supplement: c9nr04408f1.pdf [file c9nr04408f1.pdf]

## Supporting Information

### **Hierarchical Porous Fe/N doped Carbon Nanofibers as Host**

### **Materials for High Sulfur Loading Li-S Batteries**

*Mao Jiang,<sup>a,b</sup> Ruxing Wang,<sup>a</sup> Kangli Wang,<sup>\*,a</sup> Shu Gao,<sup>a,c</sup> Jing Han,<sup>b</sup> Jie Yan,<sup>b</sup> Shijie Cheng<sup>a</sup> and Kai Jiang<sup>\*,a</sup>*

<sup>a</sup>State Key Laboratory of Advanced Electromagnetic Engineering and Technology, School of Electrical and Electronic Engineering, Huazhong University of Science and Technology, Wuhan, Hubei 430074, China.

<sup>b</sup>State Key Laboratory of Materials Processing and Die & Mould Technology, School of Materials Science and Engineering, Huazhong University of Science and Technology, Wuhan, Hubei 430074, China.

<sup>c</sup>School of Physics and Information Engineering & Key Laboratory of Optoelectronic Chemical Materials and Devices of Ministry of Education, Jiangnan University, Wuhan, Hubei 430056, China.

E-mail: [kjiang@hust.edu.cn](mailto:kjiang@hust.edu.cn); [klwang@hust.edu.cn](mailto:klwang@hust.edu.cn)

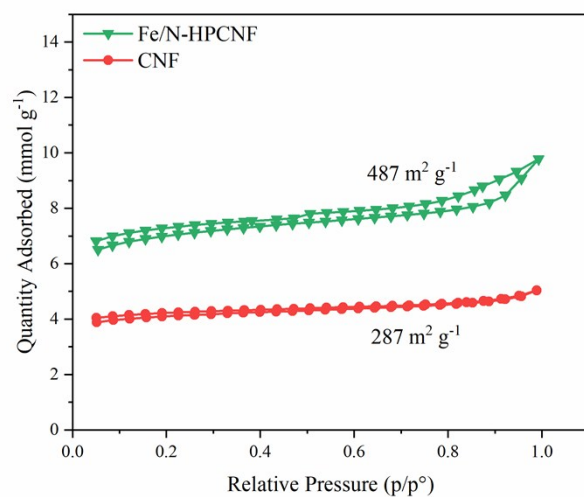

**Fig. S1.** BET surface area comparison of Fe/N-HPCNF and CNF

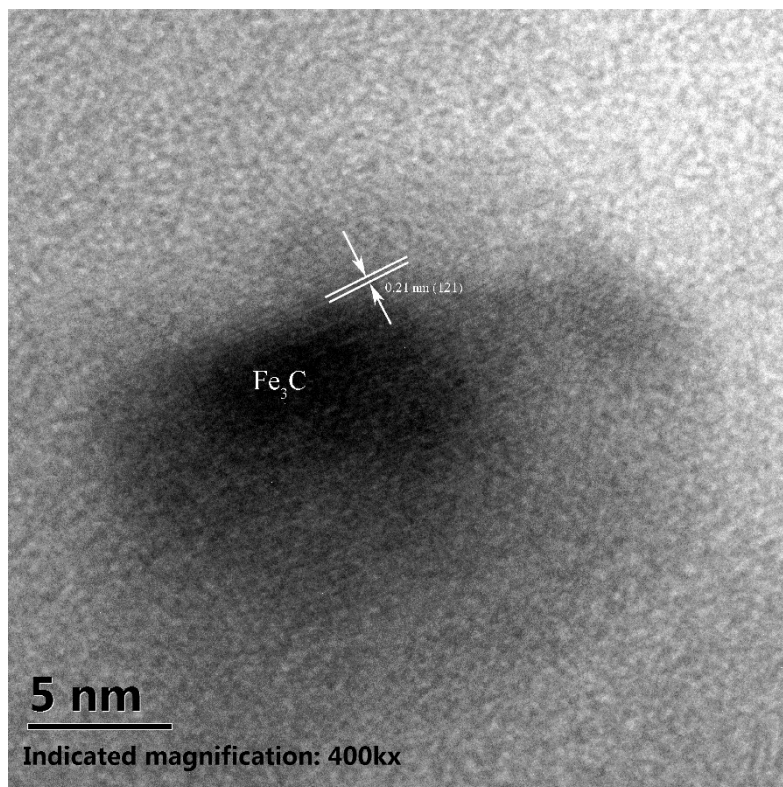

**Fig. S2.** TEM images of Fe<sub>3</sub>C in the Fe/N-HPCNF

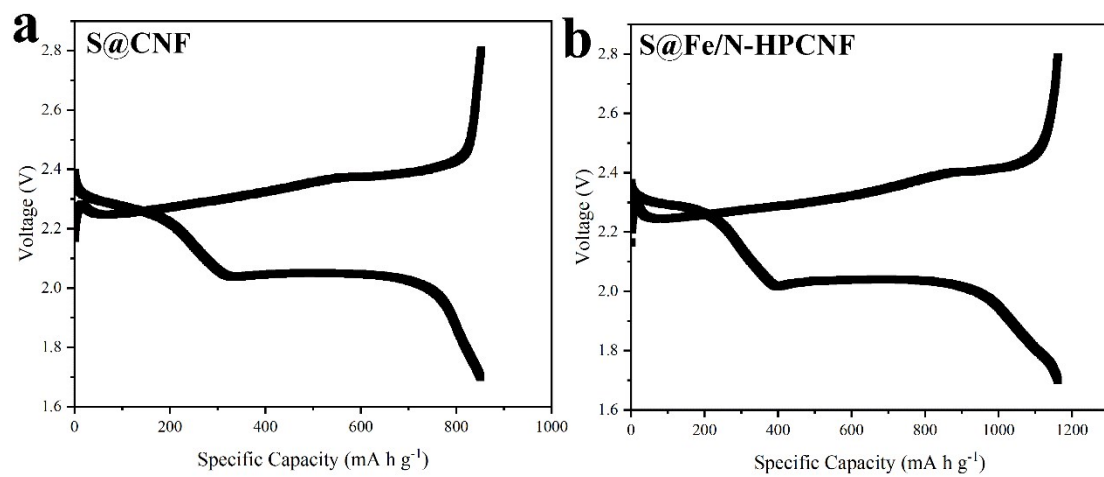

**Fig. S3.** Charge/Discharge curves of (a) S@CNF and (b) S@Fe/N-HPCNF at 0.5 C.
